# Supplementary material for: A highly efficient interface hole transporting tunnel by a bipyridine semiconductor for perovskite solar cells
Source: Royal Society of Chemistry journal article supplement (doi:10.1039/d2tc03649e), 2022-01-01
Supplement: d2tc03649e1.pdf [file d2tc03649e1.pdf]

1 Supplementary Information

2 **Highly efficient interfacial hole transporting tunnel of bipyridine**

3 **semiconductor for perovskite solar cells**

4 Jinxue Zhang<sup>a,b</sup>, Fantai Kong<sup>a\*</sup>, Yaole Peng<sup>a,b</sup>, Chundie Zhao<sup>a,b</sup>, Shuanhong Chen<sup>a</sup>,

5 Rahim Gradari<sup>c</sup>, Wenjun Liu<sup>a</sup>

6

7 <sup>a</sup> Key Laboratory of Photovoltaic and Energy Conservation Materials, Institute of Solid State

8 Physics, Hefei Institute of Physical Science (HFIPS), Chinese Academy of Sciences, Hefei, 230031,

9 China.

10 <sup>b</sup> University of Science and Technology of China, Hefei, 230026, China

11 <sup>c</sup> Computational Chemistry Laboratory, Department of Organic and Biochemistry, Faculty of

12 Chemistry, University of Tabriz, 5166616471, Tabriz, Iran

13 \*Email: kongfantai@163.com

14

15 **Contents**

16 **1. Materials and reagents**

17 **2. Synthetic routes**

18 **3. Perovskite solar cells fabrication**

19 **4. Characterization and measurements**

20 **5. Figures and tables**

21

1

## 2 1. Materials and reagents

3 4,4'-([2,2'-bipyridine]-4,4'-diyl)bis(N,N-bis(4-methoxyphenyl)aniline)(4-BA) was synthesized via  
4 a Suzuki coupling reaction. All other reagents were obtained from commercial companies.  
5 Methylammonium Iodide (MAI),  $\text{PbI}_2$ , formamidinium iodide (FAI), CsI, and methylammonium  
6 Chloride (MACl) were purchased from Xi'an Polymer Light Technology Co., Ltd. Dimethyl  
7 formamide (DMF), Dimethyl sulfoxide (DMSO) and isopropyl alcohol (IPA) were purchased from  
8 China National Medicines Corporation Ltd. 4,4'-((4-bromophenyl)methylene)bis(methoxybenzene)  
9 and 4-methoxy-N-(4-methoxyphenyl)-N-(4-(4,4,5,5-tetramethyl-1,3,2-dioxaborolan-2-  
10 yl)phenyl)aniline were bought from Inno-Chem Science & Technology Co., Ltd..

## 11 2. Synthetic routes

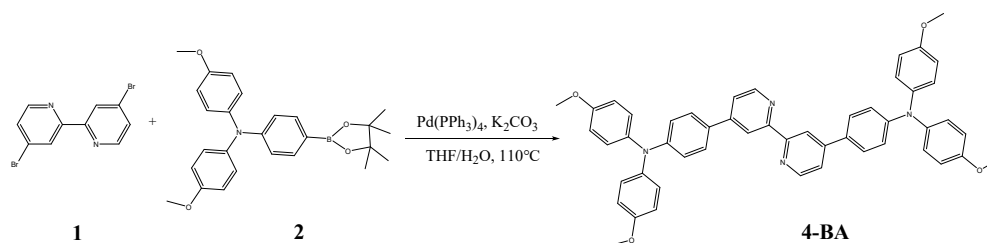

**Scheme S1.** Synthetic route of 4-BA.

16 **Synthesis of 4-BA.** 4,4'-dibromo-2,2'-bipyridine (0.139g, 0.443 mmol), 4-methoxy-N-(4-  
17 methoxyphenyl)-N-(4-(4,4,5,5-tetramethyl-1,3,2-dioxaborolan-2-yl)phenyl)aniline (0.439 mg,  
18 1.02mmol),  $\text{Pd}(\text{PPh}_3)_4$  (16 mg, 0.014 mmol), and  $\text{K}_2\text{CO}_3$  solution(2mol/L, 10mL) in anhydrous  
19 toluene (10 mL) were placed in a Schlenk tube under nitrogen atmosphere and was stirred at 110°C  
20 for 48 h. After cooling, the reaction was quenched with water, and then extracted with  
21 dichloromethane. The organic layer was washed with brine and dried over anhydrous  $\text{Na}_2\text{SO}_4$ . After

1 evaporation of the solvent, the residue was purified by column chromatography over silica gel, with  
2 dichloromethane: Petroleum etheras (2:1) as the solvent. 4-BA was obtained as a yellow solid (427  
3 mg, yield 74%). <sup>1</sup>H NMR (600 MHz, chloroform-*d*, δ, ppm): 8.50 (d, *J* = 7.7 Hz, 2H), 8.01 (d, *J* =  
4 8.4 Hz, 4H), 7.85 (t, *J* = 7.8 Hz, 2H), 7.69 (d, *J* = 7.9 Hz, 2H), 7.14 (d, *J* = 8.5 Hz, 7H), 7.06 (d, *J* =  
5 8.4 Hz, 4H), 6.88 (d, *J* = 8.5 Hz, 7H), 3.84 (s, 12H). <sup>13</sup>C NMR (151 MHz, chloroform-*d*, δ, ppm):  
6 156.06 (d, *J* = 4.4 Hz), 140.71, 137.39, 127.60, 126.82, 120.20, 119.30, 118.53, 114.74, 55.53.  
7 HRMS-ESI (*m/z*): [M + H]<sup>+</sup> Calcd. For (C<sub>50</sub>H<sub>42</sub>N<sub>4</sub>O<sub>4</sub>), 763, found: 763.

### 8 **3. Perovskite solar cells fabrication**

9 The etched FTO glass substrates were cleaned with acetone, isopropyl alcohol, and deionized water  
10 for 20 min, respectively and finally treated for 20 min by ultraviolet ozone. The titanium  
11 diisopropoxide bis(acetylacetonate)/isopropanol solution was sprayed on FTO glass and then heated  
12 at 450 °C for 1 h to prepare the c-TiO<sub>2</sub> layer. 30 μL of the TiO<sub>2</sub> slurry was then spin-coated on the  
13 c-TiO<sub>2</sub> layer and annealed at 500 °C for 30 min to prepare m-TiO<sub>2</sub>. The perovskite film was  
14 fabricated by a one-step spin coating method. The 1.4 mol/L Cs<sub>0.05</sub>FA<sub>0.95</sub>MA<sub>0.05</sub>PbI<sub>3</sub> solution was  
15 prepared with PbI<sub>2</sub> 0.6777g, FAI 0.2287g, MAI 0.0111g, CsI 0.0182g, MACl 0.0188g and DMSO:  
16 DMF= 300 μL: 700μL. The solution of perovskite was spin-coated at 1000 rpm for 10 s and 5000  
17 rpm for 30 s on the electron layer then extracted with chlorobenzene as antisolvent and annealed at  
18 150 °C for 10 min to get the perovskite film. Then the Spiro-OMeTAD layer solution containing  
19 73.5 mg of Spiro-OMeTAD, 1 mL chlorobenzene, 29 μL *t*BP, 17 μL  
20 bis(trifluoromethane)sulfonimide lithium salt (196 mg/379 μL acetonitrile) and 8 μL FK 209 Co

1 (III) TFST salt (99 mg/263  $\mu\text{L}$  acetonitrile) was spin-coated at 3000  $\text{r min}^{-1}$  for 20 s in dry air  
2 atmosphere and the gold electrode was deposited by thermal evaporation.

### 3 **4. Characterization and measurements**

4 The NMR spectra were obtained from a Bruker AV-600 NMR (Germany) spectrometer (in  
5  $\text{CDCl}_3$ ). The software used is Gaussian 09, based on the B3LYP6-31G basis set, to calculate the  
6 optimized structure of the molecule, the intramolecular dihedral angle, the highest occupied  
7 molecular orbital (HOMO) and the lowest unoccupied molecular orbital (LUMO) distribution and  
8 electrostatic potential distribution (ESP). The curves of XRD were measured by X-ray diffraction  
9 (Rigaku Smartlab 9kW). Confocal photoluminescence (PL) maps were obtained with a confocal  
10 Raman microscope (Thermo-Fisher). UV-vis absorption spectra were recorded with a UV  
11 spectrophotometer (Hitachi U-3900H). Surface and cross-sectional images were acquired by field  
12 emission scanning electron microscopy (SU8220, Hitachi). Steady-state PL spectra were obtained  
13 using (QM400-TM). The energy levels and chemical composition of the films were analyzed using  
14 ultraviolet photoelectron spectroscopy (UPS) and X-ray photoelectron spectroscopy (Thermo  
15 Scientific, ESCALAB 250Xi). CV tests were performed with a CHI66d electrochemical analyzer  
16 (Shanghai CH Instruments, China). TGA was performed with TGA-Q5000IR and DSC  
17 measurements were performed with a DSC Q2000 instrument. The instrument model of the  
18 scanning electron microscope used was GeminiSEM 450. Water contact angles were measured by  
19 OCA15E (DataPhysics). Photocurrent-voltage ( $J-V$ ) characteristics are measured under AM 1.5  
20 illumination by a 3A grade solar simulator (Newport, USA, 94043A). IPCE was performed on IPCE  
21 measurement kit (Newport, USA).

1 The CV tests were measured by CHI66d electrochemical analyzer (Shanghai CH Instruments,  
2 China) in a three-electrode cell. The working electrode was a glassy carbon electrode, used in  
3 conjunction with a Pt wire counter electrode and a saturated calomel reference electrode. An amount  
4 of 0.1 mol/L tetrabutylammonium hexafluorophosphate (TBAPF<sub>6</sub>) solution in CH<sub>2</sub>Cl<sub>2</sub> was used as  
5 the supporting electrolyte. The Fc/Fc<sup>+</sup> redox couple was used as an external potential reference. The  
6 scanning rate was 50 mV/s.

7 TGA was performed with TGA-Q5000IR at a heating rate of 10 °C/min from 50 °C to 700°C  
8 under a nitrogen atmosphere. DSC measurements were performed with a DSC Q2000 instrument at  
9 a heating rate of 5 °C/min under a nitrogen atmosphere from 50°C to 200°C.

10 The space-charge-limited current (SCLC) method was used to evaluate hole mobility. The  
11 device structure of FTO/PEDOT:PSS(Poly(3,4-ethylenedioxythiophene)/poly  
12 (styrenesulfonate))/HTM with/without 4-BA/Au. The limited current of space-charge can be labeled  
13 by calculation below:

14 
$$J^{1/2} = 9\mu\epsilon_0\epsilon_r V^2 / 8d^3$$

15 where  $J$  is the current density,  $\mu$  is the hole mobility,  $\epsilon_0$  is the vacuum permittivity ( $8.85 \times 10^{-12}$  F/m),  
16  $\epsilon_r$  is the dielectric constant of the material,  $V$  is the applied bias, and  $L$  is the film thickness. For  
17 defect density measurement, the  $n_{\text{trap}}$  values were calculated by calculation below:

18 
$$n_{\text{trap}} = 2\epsilon\epsilon_0 V_{\text{TFL}} / eL^2$$

19 Where  $\epsilon$  is the relative dielectric constant of perovskite (32 F/m),  $L$  is the thickness of the perovskite  
20 film,  $e$  is the elementary charge of the electron ( $e = 1.6 \times 10^{-19}$  C), and  $\epsilon_0$  is the vacuum permittivity.

21  
22

1 5.Figures and tables.

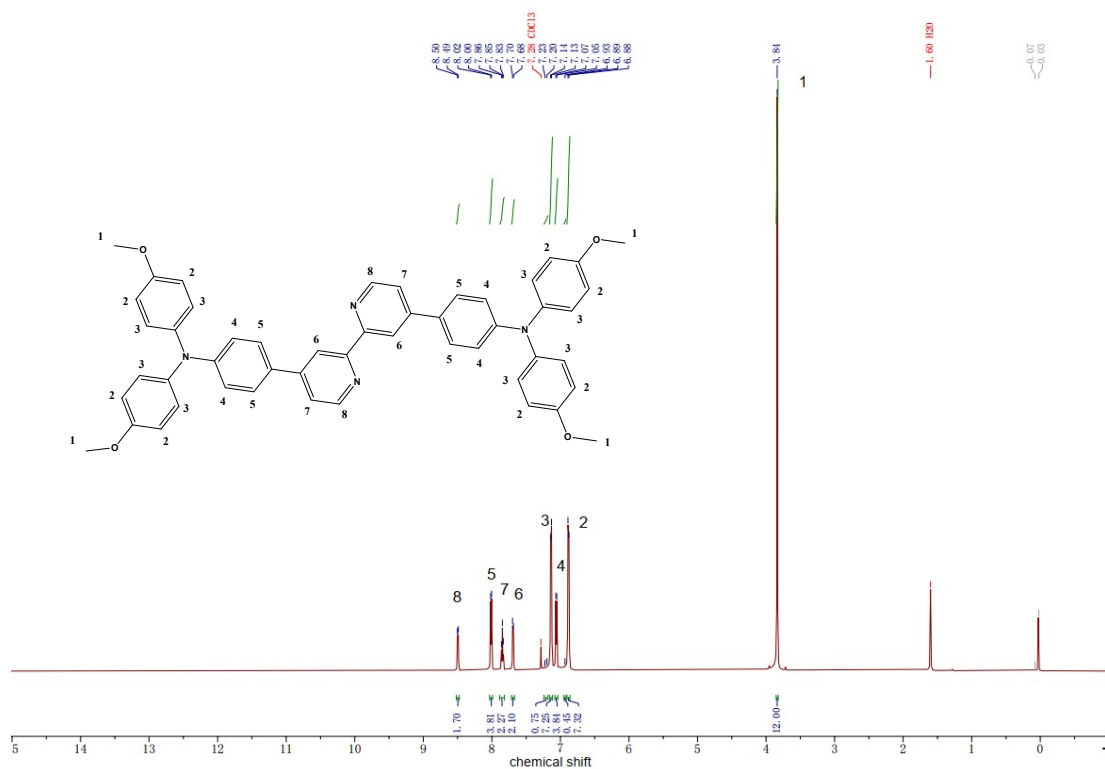

2

3

Fig S1. <sup>1</sup>H-NMR spectrum of 4-BA in CDCl<sub>3</sub>.

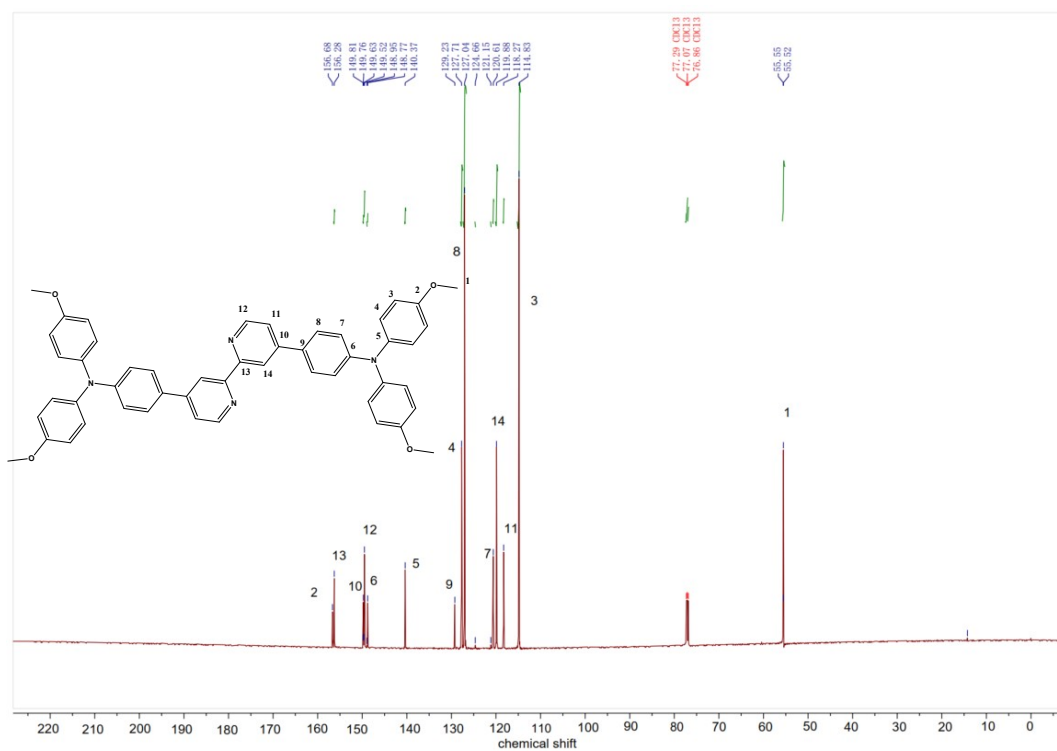

4

5

Fig. S2. <sup>13</sup>C-NMR spectrum of 4-BA in CDCl<sub>3</sub>.

1

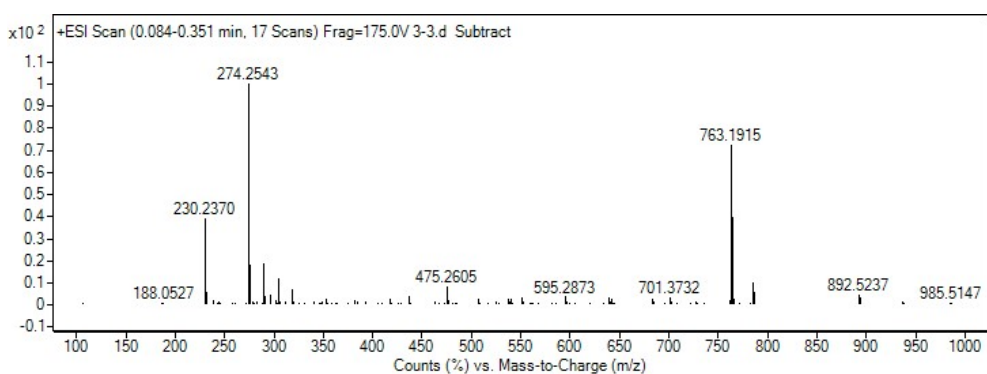

2

3

**Fig. S3.** High resolution mass spectrometry of 4-BA.

4

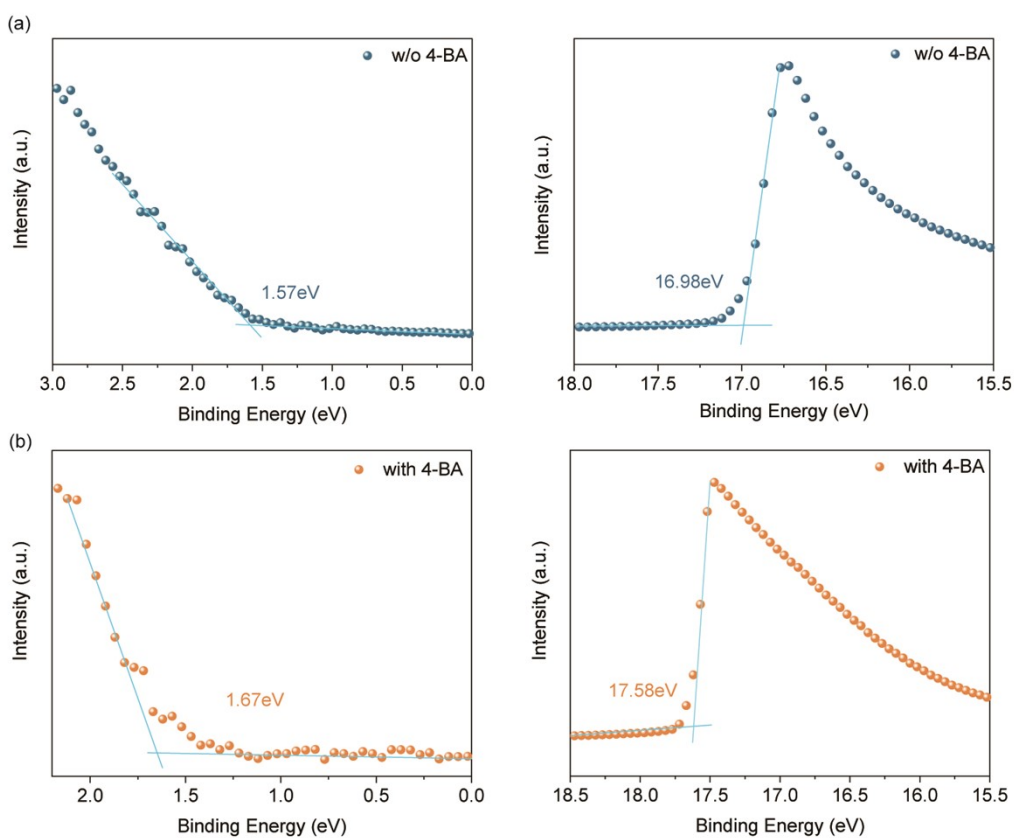

5

6

7

**Fig. S4.** UPS spectra of perovskite films with/without 4-BA.

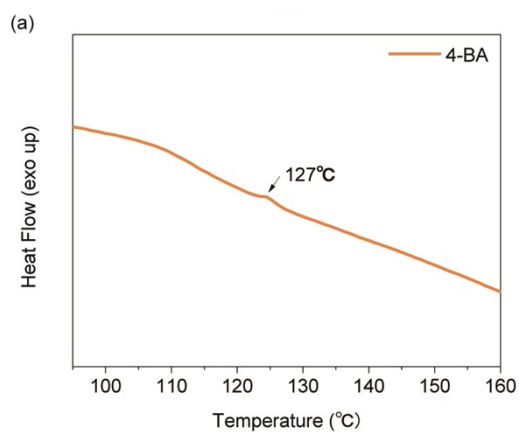

1  
2

**Fig. S5.** (a) The DSC of 4-BA under nitrogen at a heating rate of 5 °C/min.

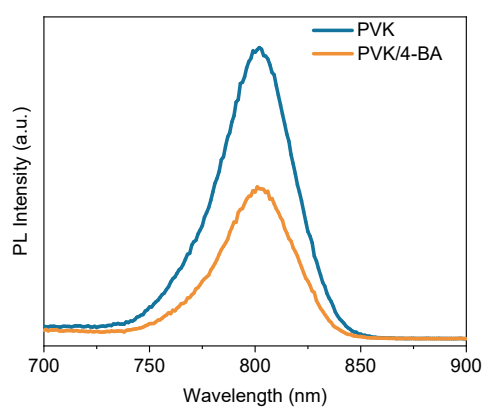

3  
4  
5

**Fig. S6** Steady-state PL spectra of perovskite films with/without 4-BA.

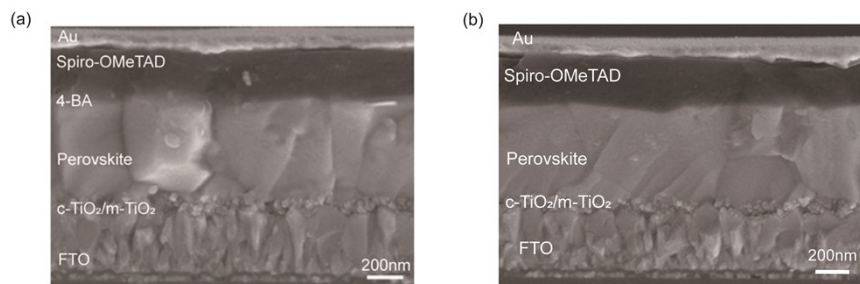

6

7 **Fig. S7** (a) Cross-sectional SEM image of the device with 4-BA. (b) Cross-sectional SEM image of  
8 the device without 4-BA.



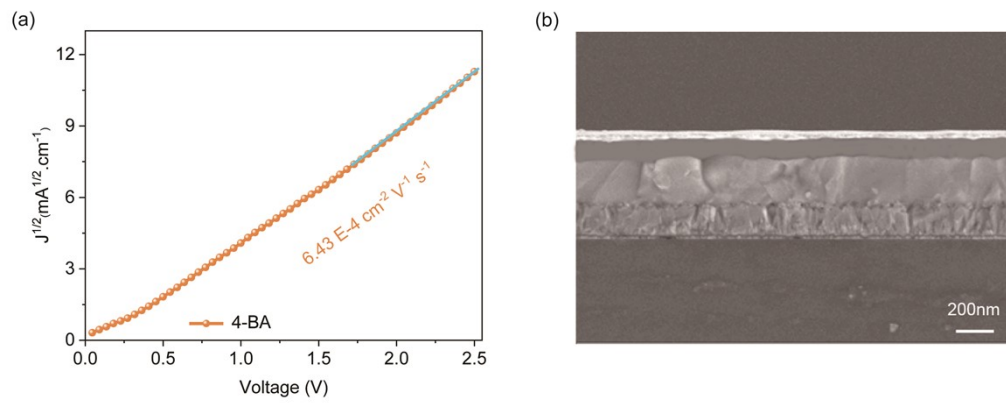

1

2 **Fig. S8** (a)The space-charge limited current (SCLC) curve of 4-BA only device. (b) Cross-sectional

3 SEM image of the FTO/Perovskite/4-BA/Au.

4

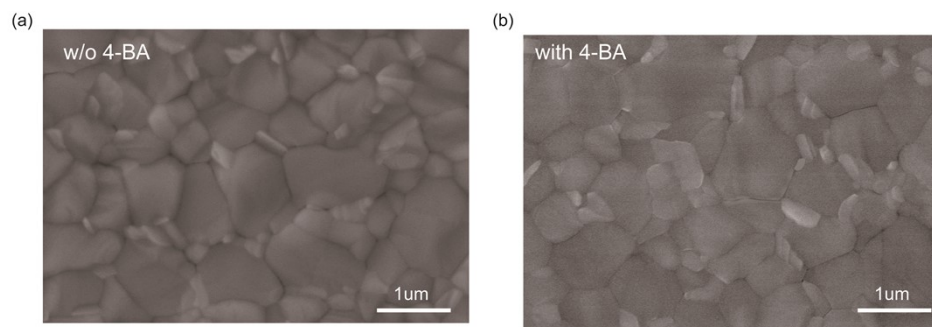

5

6

7

**Fig. S9.** Top-view SEM images of perovskite films with/without 4-BA

8

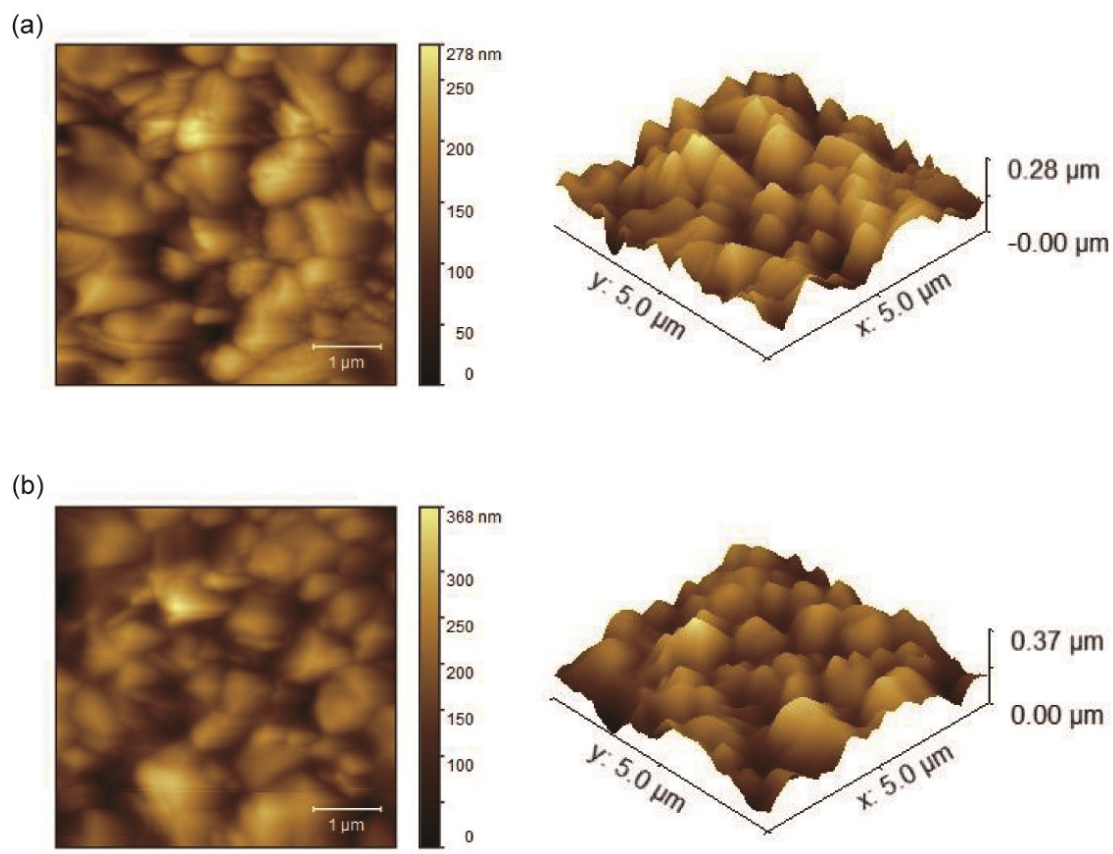

1  
2

3 **Fig. S10** (a)The AFM images of perovskite film with 4-BA. (b) The AFM images of perovskite  
4 film without 4-BA.

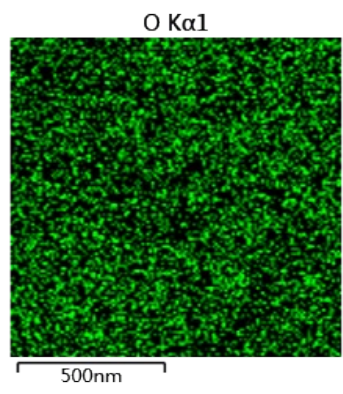

5

6 **Fig. S11** O element mapping of the perovskite film with 4-BA.

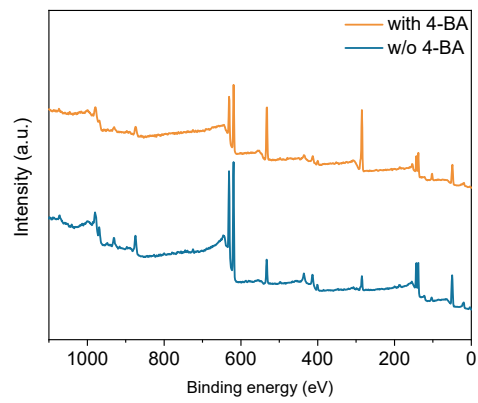

1  
2  
3

**Fig. S12** XPS spectra of perovskite with/without 4-BA.

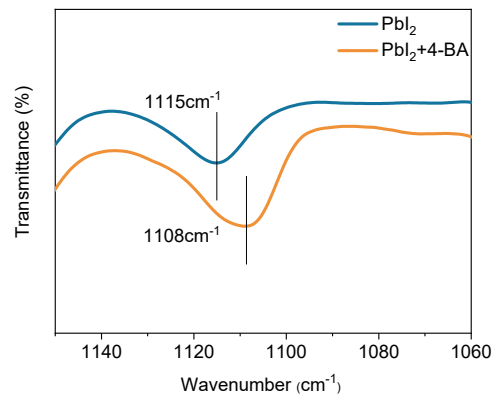

4  
5  
6

**Fig. S13** FT-IR spectra of  $\text{PbI}_2$  and  $\text{PbI}_2$  mixtures with 4-BA.

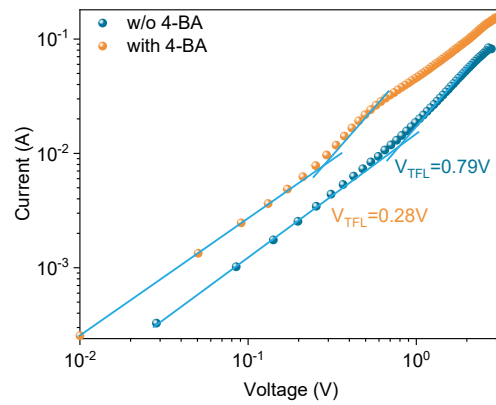

7  
8 **Fig. S14** Trap density of perovskite films measured with/without 4-BA by use electron only  
9 device  $J$ - $V$  curves.

1

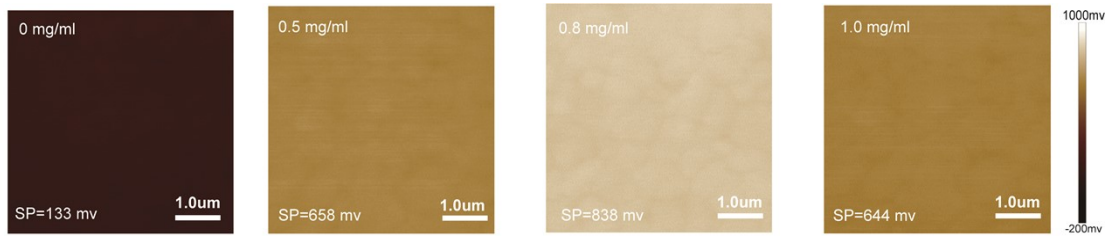

2

3

4 **Fig. S15** The surface potential of devices with 4-BA at different concentrations.

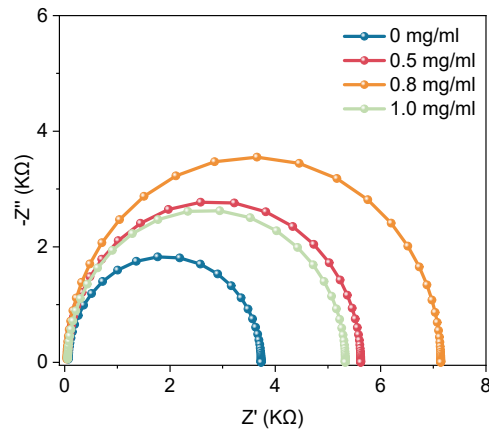

5

6 **Fig. S16** The EIS of devices with 4-BA at different concentrations.

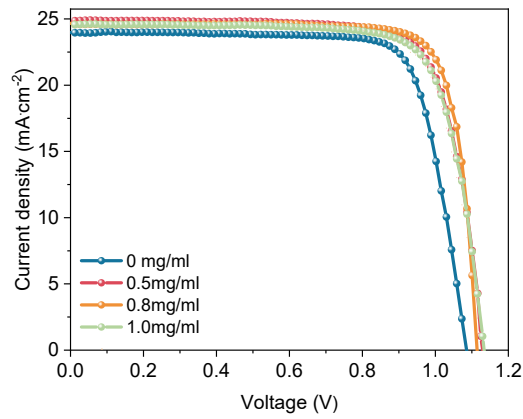

7

8 **Fig. S17** The  $J-V$  curves of devices with 4-BA at different concentrations.

9

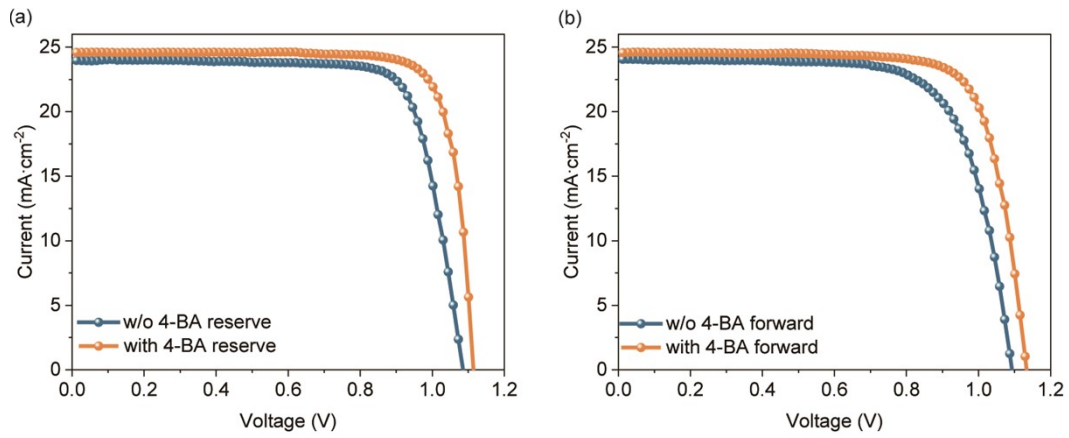

1  
 2 **Fig. S18** (a) Reserve scan  $J-V$  curves of devices with/without 4-BA. (b) Forward scan  $J-V$  curves  
 3 of devices with/without 4-BA.  
 4

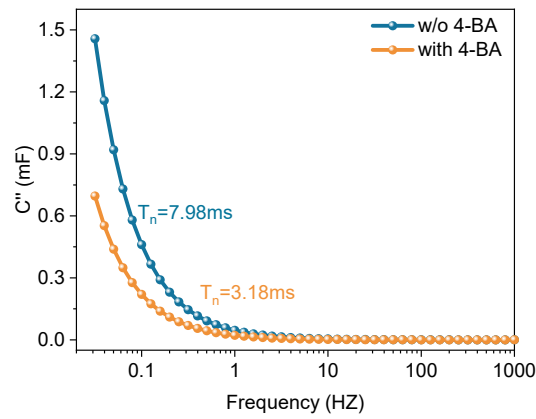

5  
 6 **Fig. S19.** Relationship between imaginary capacitance and frequency of PSCs device with/without  
 7 4-BA.  
 8

9 **Table S1** Calculated parameters of devices w/o 4-BA and with 4-BA (0.8mg/ml) from EIS.

10

| Sample    | $R_s$ ( $\Omega$ ) | $R_{ct}$ ( $\Omega$ ) |
|-----------|--------------------|-----------------------|
| w/o 4-BA  | 40.4               | 39.3                  |
| with 4-BA | 3453               | 7231                  |

11

1 **Table S2** The photovoltaic parameters with different concentrations of 4-BA.

2

| concentration | $V_{oc}$ (V) | $J_{sc}$ (mA·cm <sup>-2</sup> ) | FF(%) | PCE(%) |
|---------------|--------------|---------------------------------|-------|--------|
| 0             | 1.08         | 24.0                            | 77.5  | 20.2   |
| 0.5           | 1.13         | 24.8                            | 77.2  | 21.7   |
| 0.8           | 1.12         | 24.6                            | 81.7  | 22.4   |
| 1.0           | 1.13         | 24.6                            | 77.0  | 21.4   |

3
